# Supplementary material for: Expression of Genes for Drug Transporters in the Human Female Genital Tract and Modulatory Effect of Antiretroviral Drugs
Source: PLoS One. 2015 Jun 23;10(6):e0131405. doi: 10.1371/journal.pone.0131405 (PMC4477895; doi:10.1371/journal.pone.0131405)
Supplement: S3 Table — (DOCX) [file pone.0131405.s003.docx]

**S3 Table. Effect of tenofovir on expression of drug transporters in cervico-vaginal cell lines.**

| Drug transportersa | Gene expression levelb | | | | | | | |
| --- | --- | --- | --- | --- | --- | --- | --- | --- |
| HEC-1A | | VK2/E6E7 | | Ect1/E6E7 | | End1/E6E7 | |
| 24 h | 72 h | 24 h | 72 h | 24 h | 72 h | 24 h | 72 h |
| ABCA1 |  |  |  |  | ↑ | ↑↑ |  |  |
| ABCA13 |  | ↑ |  | ↑ |  | ↓ |  |  |
| ABCA12 | ↑ |  |  | ↑ | ↑ |  |  |  |
| ABCA2 | ↑ |  |  |  | ↑ | ↑ |  |  |
| ABCA3 |  |  |  | ↑ |  |  |  | ↑ |
| MRP7 | ↑ |  |  |  |  | ↑ |  |  |
| MRP3 | ↑ |  |  |  |  |  |  |  |
| MRP5 |  |  | ↓ |  |  |  |  |  |
| ABCD1 | ↑ |  |  | ↑ |  |  |  | ↑ |
| ABCD4 |  |  |  | ↑ |  |  |  | ↑ |
| TAP2 |  |  | ↓ | ↓ |  |  |  |  |
| PEPT1 |  |  | ↑ |  | ↑ |  |  |  |
| PEPT2 | ↑ |  |  | ↑ | ↑ | ↑ |  | ↑↑ |
| THTR1 |  |  |  |  |  |  |  | ↑ |
| THTR2 |  |  |  |  |  |  |  | ↑ |
| GLUT1 |  |  |  |  |  | ↑ |  | ↑ |
| GLUT3 |  |  |  |  |  | ↑ |  | ↑ |
| SLC3A2 |  |  |  | ↑ |  |  |  | ↑ |
| SLC7A6 |  |  |  |  |  | ↑ |  |  |
| SLC7A7 |  |  |  |  |  |  | ↑ | ↑ |
| SLC7A8 | ↑ |  |  |  |  | ↑ |  | ↑ |
| OATPD | ↑ |  |  |  |  | ↑ |  |  |

a Drug transporters with fold change (fc) values <0.5 and >2 in at least one cell line.

b Fold change (fc) values are represented as follows: fc<0.5 as ↓, 2<fc>4 as ↑ , 4<fc>10 as ↑↑, fc>10 as ↑↑↑. Blank cells indicate no fold changes (0.5<fc>2). Data are the result of the mean of three biological replicates.
